# Supplementary material
Source: PubMed Central journal article supplement (PMC5886444)
Supplement: jcsm.14.4.661s1.pdf [file jcsm.14.4.661s1.pdf]

Table S1—Quality assessment of the included studies.

| Study                                 | A | B | C | D | E | F | G | Total / 7 | Risk of bias                                                                                                                                                                  | Level of evidence: SORT Guidelines <sup>1</sup>   |
|---------------------------------------|---|---|---|---|---|---|---|-----------|-------------------------------------------------------------------------------------------------------------------------------------------------------------------------------|---------------------------------------------------|
| Aran et al. <sup>2</sup>              | 1 | 1 | 1 | 1 | 0 | 0 | 1 | 5         | Some bias due to retrospective collection of information.                                                                                                                     | Quality: Level 2<br>Strength of recommendation: C |
| Avis et al. <sup>3</sup>              | 1 | 1 | 1 | 1 | 1 | 1 | 1 | 7         | Low risk of bias                                                                                                                                                              | Quality: Level 1<br>Strength of recommendation: B |
| Dias Costa et al. <sup>4</sup>        | 1 | 1 | 1 | 0 | 1 | 1 | 1 | 6         | Low risk of bias, although group size was small and therefore generalizability of results requires caution.                                                                   | Quality: Level 2<br>Strength of recommendation: B |
| Dorris et al. <sup>5</sup>            | 1 | 1 | 1 | 1 | 1 | 1 | 1 | 7         | Low risk of bias, although group size was small and therefore generalizability of results requires caution.                                                                   | Quality: Level 2<br>Strength of recommendation: B |
| Frolich et al. <sup>6</sup>           | 1 | 1 | 0 | 1 | 1 | 1 | 1 | 6         | Low risk of bias, although group size of narcolepsy (n=3) and idiopathic hypersomnolence (n=3) children was small and therefore generalizability of results requires caution. | Quality: Level 2<br>Strength of recommendation: C |
| Guilleminault and Pelayo <sup>7</sup> | 1 | 1 | 1 | 1 | 0 | 0 | 1 | 5         | Low risk of bias.                                                                                                                                                             | Quality: Level 2<br>Strength of recommendation: B |
| Hansen <sup>8</sup>                   | 1 | 1 | 1 | 1 | 1 | 1 | 1 | 7         | Low risk of bias, although group size was small and therefore generalizability of results requires caution.                                                                   | Quality: Level 2<br>Strength of recommendation: B |
| Inocente et al. <sup>9</sup>          | 1 | 1 | 1 | 1 | 1 | 1 | 1 | 7         | Low risk of bias.                                                                                                                                                             | Quality: Level 1<br>Strength of recommendation: B |
| Inocente et al. <sup>10</sup>         | 1 | 1 | 1 | 1 | 1 | 1 | 1 | 7         | Low risk of bias.                                                                                                                                                             | Quality: Level 1<br>Strength of recommendation: B |
| Itoet al. <sup>11</sup>               | 1 | 1 | 1 | 1 | 1 | 1 | 1 | 7         | Low risk of bias.                                                                                                                                                             | Quality: Level 2<br>Strength of recommendation: C |

|                                  |   |   |   |   |   |   |   |   |                                                                                                             |                                                   |
|----------------------------------|---|---|---|---|---|---|---|---|-------------------------------------------------------------------------------------------------------------|---------------------------------------------------|
| Jennum et al. <sup>12</sup>      | 1 | 0 | 1 | 1 | 1 | 1 | 1 | 7 | Low risk of bias                                                                                            | Quality: Level 1<br>Strength of recommendation: A |
| Karjalainen et al. <sup>13</sup> | 1 | 1 | 1 | 1 | 1 | 0 | 1 | 6 | Low risk of bias, although group size was small and therefore generalizability of results requires caution. | Quality: Level 2<br>Strength of recommendation: B |
| Kotagal et al. <sup>14</sup>     | 1 | 1 | 1 | 1 | 0 | 0 | 1 | 5 | Low risk of bias as four case reports given                                                                 | Quality: Level 2<br>Strength of recommendation: B |
| Lecendreux et al. <sup>15</sup>  | 1 | 1 | 1 | 1 | 1 | 1 | 1 | 7 | Low risk of bias                                                                                            | Quality: Level 2<br>Strength of recommendation: B |
| Partinen et al. <sup>16</sup>    | 1 | 1 | 1 | 1 | 1 | 0 | 1 | 6 | Low risk of bias                                                                                            | Quality: Level 2<br>Strength of recommendation: B |
| Posar et al. <sup>17</sup>       | 1 | 1 | 1 | 1 | 1 | 1 | 1 | 7 | Low risk of bias, although group size was small and therefore generalizability of results requires caution. | Quality: Level 2<br>Strength of recommendation: B |
| Rocca et al. <sup>18</sup>       | 1 | 1 | 1 | 1 | 1 | 1 | 1 | 7 | Low risk of bias                                                                                            | Quality: Level 1<br>Strength of recommendation: B |
| Stores et al. <sup>19</sup>      | 1 | 1 | 1 | 1 | 1 | 1 | 1 | 7 | Low risk of bias.                                                                                           | Quality: Level 2<br>Strength of recommendation: B |
| Szakács et al. <sup>20</sup>     | 1 | 1 | 1 | 1 | 1 | 1 | 1 | 7 | Low risk of bias                                                                                            | Quality: Level 1<br>Strength of recommendation: A |
| Szakács <sup>21</sup>            | 1 | 1 | 1 | 1 | 1 | 1 | 1 | 7 | Low risk of bias                                                                                            | Quality: Level 2<br>Strength of recommendation: B |

## Supplemental References

1. Ebell MH, Siwek J, Weiss BD, Woolf SH, Susman J, Ewigman B, Bowman M. Strength of recommendation taxonomy (SORT): a patient-centered approach to grading evidence in the medical literature. *Am Fam Physician*. 2004;69(3):548-556.
2. Aran A, Einen M, Lin L, Plazzi G, Nishino S, Mignot E. Clinical and therapeutic aspects of childhood narcolepsy-cataplexy: a retrospective study of 51 children. *Sleep*. 2010;33(11):1457-1464.
3. Avis KT, Shen J, Weaver P, Schwebel DC. Psychosocial characteristics of children with central disorders of hypersomnolence versus matched healthy children. *J Clin Sleep Med*. 2015;11(11):1281-1288.
4. Dias Costa F, Barreto MI, Clemente V, Vasconcelos M, Estevao MH, Madureira N. Narcolepsy in pediatric age - experience of a tertiary pediatric hospital. *Sleep Sci*. 2014;7(1):53-58.
5. Dorris L, Zuberi SM, Scott N, Moffat C, McArthur I. Psychosocial and intellectual functioning in childhood narcolepsy. *Dev Neurorehabil*. 2008;11(3):187-194.
6. Frolich J, Wiater A, Lehmkuhl G, Niewerth H. The clinical value of the maintenance of wakefulness test (MWT) in the differentiation of children with attention deficit hyperactivity disorder (ADHD) and disorders of excessive somnolence. *Somnologie*. 2001;5(4):141-144.
7. Guilleminault C, Pelayo R. Narcolepsy in prepubertal children. *Ann Neurol*. 1998;43(1):135-142.
8. Hansen DE. *Cognitive effects of sleep apnea and narcolepsy in school age children* [doctoral thesis]. St. Louis, MO: University of Missouri-St. Louis; 1997.
9. Inocente CO, Gustin MP, Lavault S, et al. Quality of life in children with narcolepsy. *CNS Neurosci Ther*. 2014;20(8):763-769.
10. Inocente CO, Gustin MP, Lavault S, et al. Depressive feelings in children with narcolepsy. *Sleep Med*. 2014;15(3):309-314.
11. Ito H, Kenji M, Tatsuo M, Aya G, Kagami S. Case of early childhood-onset narcolepsy with cataplexy: comparison with a monozygotic co-twin. *Pediatr Int*. 2014;56(5):790-793.
12. Jennum P, Pickering L, Thorstensen EW, Ibsen R, Kjellberg J. Morbidity of childhood onset narcolepsy: a controlled national study. *Sleep Med*. 2017;29:13-17.
13. Karjalainen S, Nyrhila AM, Maatta K, Uusiautti S. Going to school with narcolepsy - perceptions of families and teachers of children with narcolepsy. *Early Child Dev Care*. 2014;184(6):869-881.
14. Kotagal SV, Hartse KM, Walsh JK. Characteristics of narcolepsy in preteenaged children. *Pediatrics*. 1990;85(2):205-209.
15. Lecendreux M, Lavault S, Lopez R, et al. Attention-deficit/hyperactivity disorder (ADHD) symptoms in pediatric narcolepsy: a cross-sectional study. *Sleep*. 2015;38(8):1285-1295.
16. Partinen M, Saarenpaa-Heikkila O, Ilveskoski I, et al. Increased incidence and clinical picture of childhood

narcolepsy following the 2009 H1N1 pandemic vaccination campaign in Finland. *PloS One*. 2012;7(3):e33723.

17. Posar A, Pizza F, Parmeggiani A, Plazzi G. Neuropsychological findings in childhood narcolepsy. *J Child Neurol*. 2014;29(10):1370-1376.
18. Rocca FL, Finotti E, Pizza F, et al. Psychosocial profile and quality of life in children with type 1 narcolepsy: a case-control study. *Sleep*. 2016;39(7):1389-1398.
19. Stores G, Montgomery P, Wiggs L. The psychosocial problems of children with narcolepsy and those with excessive daytime sleepiness of uncertain origin. *Pediatrics*. 2006;118(4):e1116–e1123.
20. Szakács A, Hallböök T, Tideman P, Darin N, Wentz E. Psychiatric comorbidity and cognitive profile in children with narcolepsy with or without association to the H1N1 influenza vaccination. *Sleep*. 2015;38(4):615-621.
21. Szakács A. *Narcolepsy in children: Relationship to the H1N1 influenza vaccination, association with psychiatric and cognitive impairments and consequences in daily life* [doctoral thesis]. Gothenburg, Sweden: University of Gothenburg; 2016.
